# Supplementary material
Source: Research Square preprint supplement (doi:10.21203/rs.3.rs-9033581/v1)
Supplement: Supplementary file 1 [file 131a767048727938887dbdd6.docx]

Adapted questionnaire used for data collection, including demographic items, behavioral risk factor questions, physical activity items adapted from IPAQ, dietary intake questions, stress items, and Health Belief Model (HBM) constructs.

**Section 1: Demographic data**

Please complete all of the following questions by writing in appropriate place or circle the your most appropriate option.

1. Age (in years): -----------
2. Sex : Male Female
3. Height (cm): --------------- 4. Weight (Kg): ---------------
4. What is your highest level of education?
   1. Primary school b. Secondary c. High school d. College/University
5. What is your Marital Status?

a. Single b. Married c. Widowed d. Divorced

1. What is your nationality?
   1. Filipino b. Indian c. Nepali d. Pakistani e. Sri Lankan
   2. Any other (Specify) ---------------
2. What is your Occupation (work)?

a. Manager b. Executive c. Secretary d. Office attendant

e. Security guard f. House keeping

h. Any Others (specify)------------------------

1. History of disease
   1. Heart disease b. Diabetes Mellitus c. Hypertension
2. None e. I do not know
3. Do you have family history of Heart disease?
   1. Yes b. No
4. Sources of information obtained on heart disease and its prevention

a. Social media b. Health worker c. Friend d. Work place

**Section:2**

| **Behavioral risk factors** | |
| --- | --- |
| **Questions** | **Response** |
| **Smoking** |  |
| 1.Do you smoke?  **If yes, answer questions from 2to 4 or skip to q.no.5**  2. How often do you smoke | 1. Yes 2. No 3. Quit 4. Daily 5. Weekly 6. Monthly 7. Rarely |
| 3. If you smoke daily? How many cigarettes do you smoke daily? | a.-------------- cigarettes per day |
| 4. Since how many years you have been smoking | - 1. less than 1 year   2. 1- 2 years   3. 2-4 years   4. More than 4 years |
| 5.Do you use any other form of tobacco | a. Yes b. No |
| 6. Does anyone smoke in your home? | a. Yes b. No |
| **Physical activity-Exercise** | |
| **Questions** | **Response** |
| Vigorous intensity   1. During the last 7 days, on how many days did you do vigorous physical activities like heavy lifting, running, football, basketball, Padel squash, single tennis, walking upstairs, aerobics or fast cycling 2. How much time did you usually spend doing vigorous physical activities on one of those days? | a.---------------Days per week  b. No vigorous physical activities  a.-------------hours per day  b.------------Minutes per day  c. Don’t know /not sure |
| **Moderate intensity**   1. During the last 7 days, on how many days did you do moderate physical activities like heavy lifting, swimming, playing volley ball, bicycling at a regular pace or double tennis? 2. How much time did you usually spend doing moderate physical activities on one of those days? | a.----------Days per week  b. No moderate physical activities  a. -----------Hours per day  b.-----------Minutes per day  c……….don’t know/not sure |
| **Walking**   1. During the last 7 days, on how many days did you walk for at least 10 minutes at a time? 2. How much time did you usually spend walking on one of those days? | a._____ Days per week b. No walking  a. _____Hours per day  b._____ Minutes per day  c. Don’t know/not sure |
| 1. During the last 7 days, how much time did you spend sitting on a week day (working day)? | a._____ Hours per day  b._____ Minutes per day  c. Don’t know/not sure |
| **Nutrition/Diet, fruit and vegetable consumption** | |
| 1.In a week, how many days do you eat fruits?  2. How many servings(times) per day? | a.--------- Days  b.--------- servings/times |
| 3.In a week, how many days do you eat vegetables?  4. How many servings(times) per day? | a.--------- Days  b.--------- servings/times |
| 3.Do you eat fiber fiber containing foods like beans, wholegrain products, fruits and vegetables daily | 1. Yes b. No |
| 4.What type of oil is often used for meal preparation in your household? | a. Sunflower b. Corn c. Olive  d. Mustard e. Coconut  f. Gingelly  g. Others--------------- |
| 5. What type of fat is often used for meal preparation in your household? | a. Butter b. Ghee  c. Margarine d. Cheese  c. Vegetable fat d. Animal fat |
| 5.Do you have the habit of adding salt at the table | 1. Yes b. No |
| 6.Do you have practice of eating foods like chips, salted nuts, canned soups, processed meats, cheese and frozen meal | 1. Yes b. No |
| 7.How often do you add salty sauce to your food right before you eat it or as you are eating it? | 1. Always 2. Often 3. Sometimes 4. Rarely 5. Never |
| 8.Do you consume carbonated drinks. If yes specify | a. Yes b. No  a. Daily b. Weekly c. Monthly  d. Occasionally |
| 9.Do you eat in a restaurant/fast food outlet  If yes, how often do you eat fast food/at restaurant | a. Yes b. No  a. Daily b. Weekly c. Monthly  d. Occasionally |
| **Stress** | |
| Do you experience stress at your work | a. Yes b. No |
| Do you take measures to reduce your stress | 1. Yes b. No |
